# Supplementary material for: Facile preparation of urchin-like NiCo2O4 microspheres for efficient hydrogen peroxide detection
Source: Royal Society of Chemistry journal article supplement (doi:10.1039/d2ra05778f), 2022-01-01
Supplement: d2ra05778f1.pdf [file d2ra05778f1.pdf]

**Supporting Information:**

**Facile preparation of urchin-like NiCo<sub>2</sub>O<sub>4</sub> microspheres for efficient  
hydrogen peroxide detection**

Jiaojiao Jiang, Zhixuan Zhang, Chong Yang, Rui Wang, Zhouling Wu\*

Department of Food Quality and Safety, School of Public Health, Zunyi Medical University, Zunyi

563000, Guizhou, P. R. China.

\* Corresponding authors.

E-mail : [WuZhouLing90@163.com](mailto:WuZhouLing90@163.com)

**Fig. S1** SEM of  $\text{NiCo}_2\text{O}_4$  microspheres precursors at different reaction time were 2 h (a), 4 h (b), 6h (c), 8 h (d) and 10 h (e), respectively. SEM results of precursor (f) and  $\text{NiCo}_2\text{O}_4$  solid microspheres (g) without adding ionic liquid. (h) TEM image of urchin-like  $\text{NiCo}_2\text{O}_4$  microspheres after the fifteen successive test (inset: the HRTEM image).

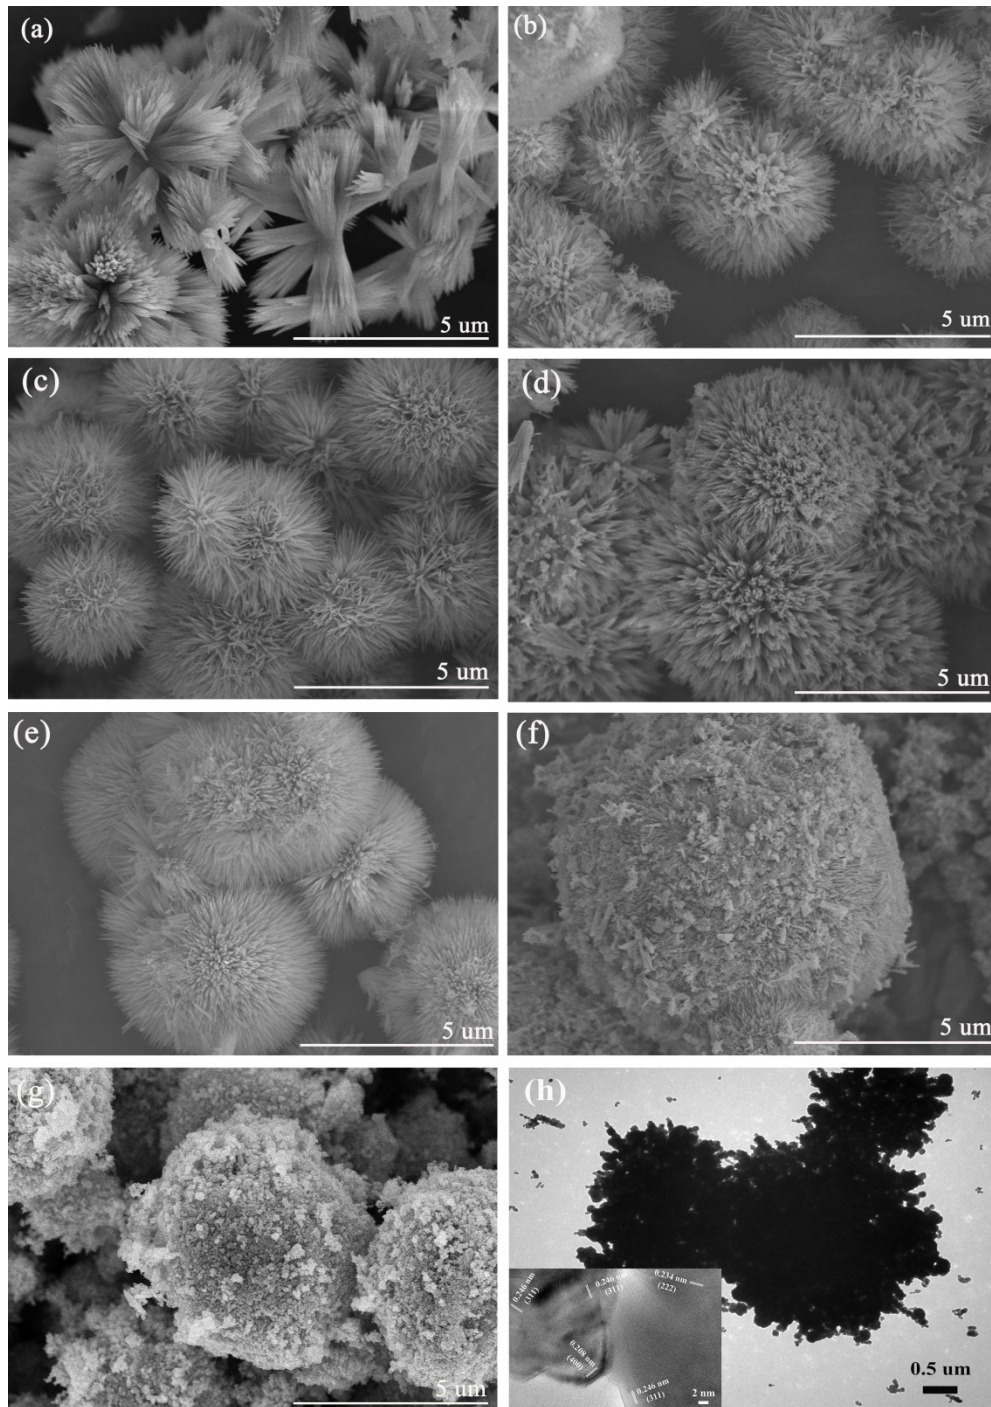

**Fig.S2** (a) Amperometric responses of NiCo<sub>2</sub>O<sub>4</sub>/RDE at different applied potentials. (b) Amperometric responses of NiCo<sub>2</sub>O<sub>4</sub>/RDE with different loadings at applied potential of 0.58 V and its corresponding calibration plot (c).

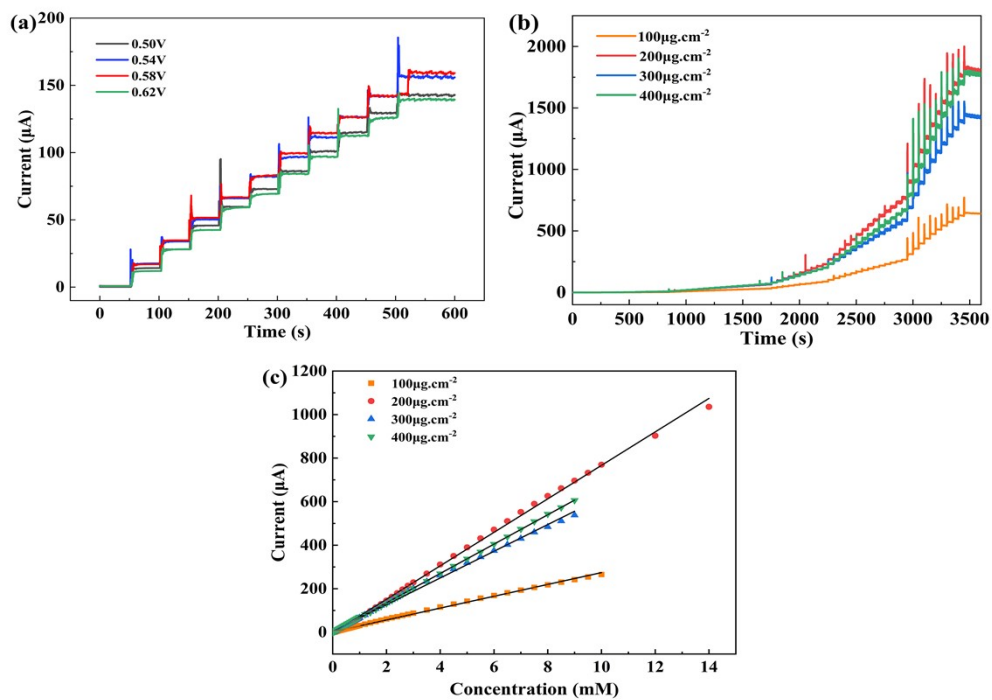

**Table S1** Performances comparison with different catalyst loadings in electrochemical H<sub>2</sub>O<sub>2</sub> detection.

| <b>Loading of catalyst<br/>(<math>\mu\text{g}\cdot\text{cm}^{-2}</math>)</b> | <b>Linear ranges<br/>(mM)</b> | <b>Sensitivity<br/>(<math>\mu\text{A}\cdot\text{mM}^{-1}\text{cm}^{-2}</math>)</b> | <b>Detection Limit<br/>(<math>\mu\text{M}</math>)</b> |
|------------------------------------------------------------------------------|-------------------------------|------------------------------------------------------------------------------------|-------------------------------------------------------|
| 100                                                                          | 0.0~10.0                      | 138.62                                                                             | 0.144                                                 |
| 200                                                                          | 0.0~14.0                      | 392.50                                                                             | 0.050                                                 |
| 300                                                                          | 0.0~9.0                       | 312.86                                                                             | 0.063                                                 |
| 400                                                                          | 0.0~9.0                       | 343.98                                                                             | 0.058                                                 |
